# Supplementary material for: Xanthones Active against Multidrug Resistance and Virulence Mechanisms of Bacteria
Source: MDPI journal article supplement (doi:10.3390/antibiotics10050600), 2021-05-19
Supplement: s1 [file s1]

## **Xanthones active against multidrug resistance and virulence mechanisms of bacteria**

**Fernando Durães <sup>1,2</sup>, Diana I. S. P. Resende <sup>1,2</sup>, Andreia Palmeira <sup>1,2</sup>, Nikoletta Szemerédi <sup>3</sup>,  
Madalena M. M. Pinto <sup>1,2</sup>, Gabriella Spengler <sup>3,\*</sup>, Emília Sousa <sup>1,2,\*</sup>**

<sup>1</sup> Laboratory of Organic and Pharmaceutical Chemistry (LQOF), Department of Chemical Sciences, Faculty of Pharmacy, University of Porto, Rua de Jorge Viterbo Ferreira, 228, 4050-313 Porto, Portugal; fduraes5@gmail.com (F. D.); apalmeira@ff.up.pt (A.P.).

<sup>2</sup> Interdisciplinary Centre of Marine and Environmental Research (CIIMAR), Terminal de Cruzeiros do Porto de Leixões, Av. General Norton de Matos s/n, 4450-208 Matosinhos, Portugal; dresende@ff.up.pt (D. I. S. P. R.); madalena@ff.up.pt (M. P.).

<sup>3</sup> Department of Medical Microbiology and Immunobiology, Faculty of Medicine, University of Szeged, Dóm tér 10, 6720 Szeged, Hungary; szemeredi.nikoletta@med.u-szeged.hu (N. S.).

\* Correspondence: spengler.gabriella@med.u-szeged.hu (G. S.); esousa@ff.up.pt (E. S.).

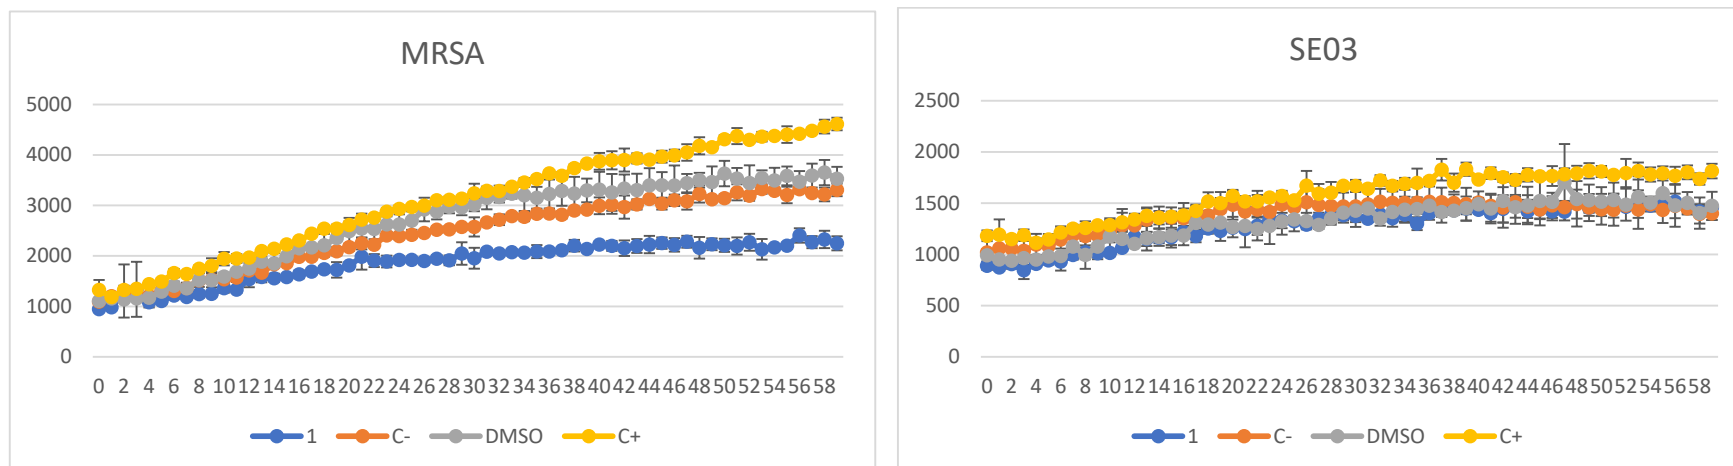

**Figure S1.** Fluorescence curves for the EB accumulation assay for compound **1**. Conditions: **1** – 50  $\mu\text{M}$  of compound **1** in a solution of EB in PBS (1  $\mu\text{g}/\text{mL}$ ); **C-** – Bacteria in a solution of EB in PBS (1  $\mu\text{g}/\text{mL}$ ); **C+** – 25  $\mu\text{M}$  of reserpine in a solution of EB in PBS (1  $\mu\text{g}/\text{mL}$ ); **DMSO** – 1% v/v of DMSO in a solution of EB in PBS (1  $\mu\text{g}/\text{mL}$ )

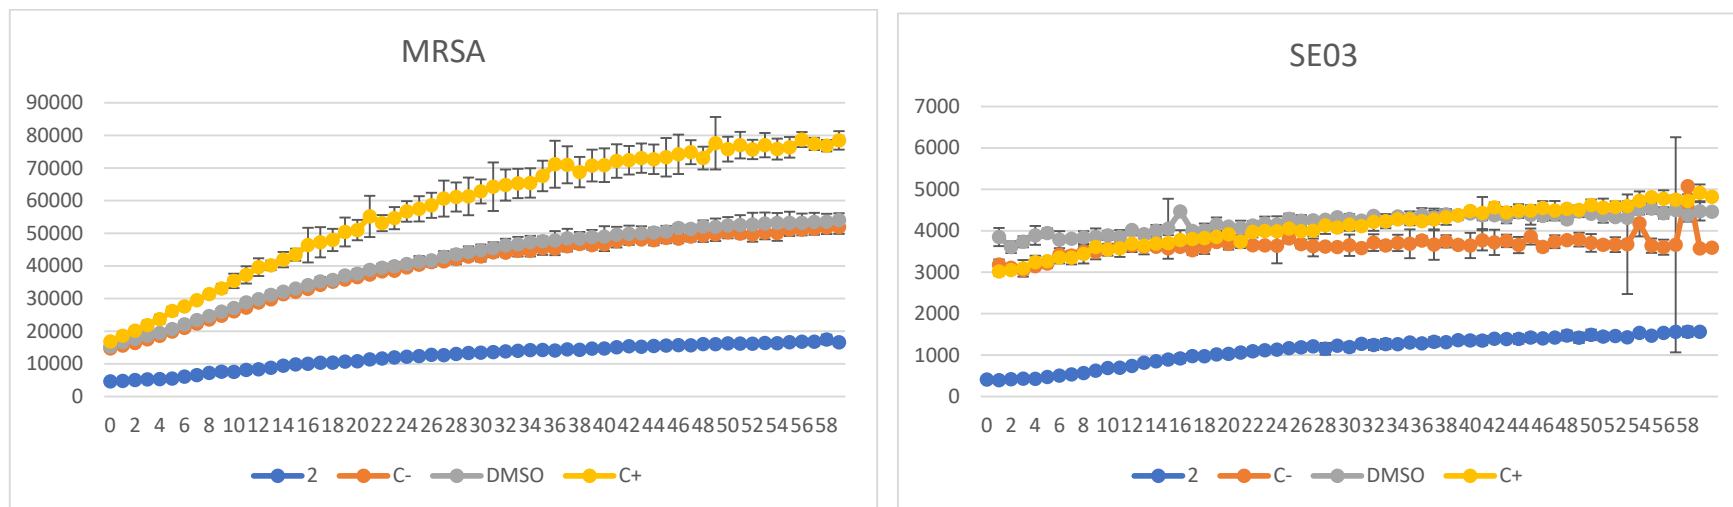

**Figure S2.** Fluorescence curves for the EB accumulation assay for compound **2**. Conditions: **2** – 50  $\mu\text{M}$  of compound **2** in a solution of EB in PBS (1  $\mu\text{g}/\text{mL}$ ); **C-** – Bacteria in a solution of EB in PBS (1  $\mu\text{g}/\text{mL}$ ); **C+** – 25  $\mu\text{M}$  of reserpine in a solution of EB in PBS (1  $\mu\text{g}/\text{mL}$ ); **DMSO** – 1% v/v of DMSO in a solution of EB in PBS (1  $\mu\text{g}/\text{mL}$ )

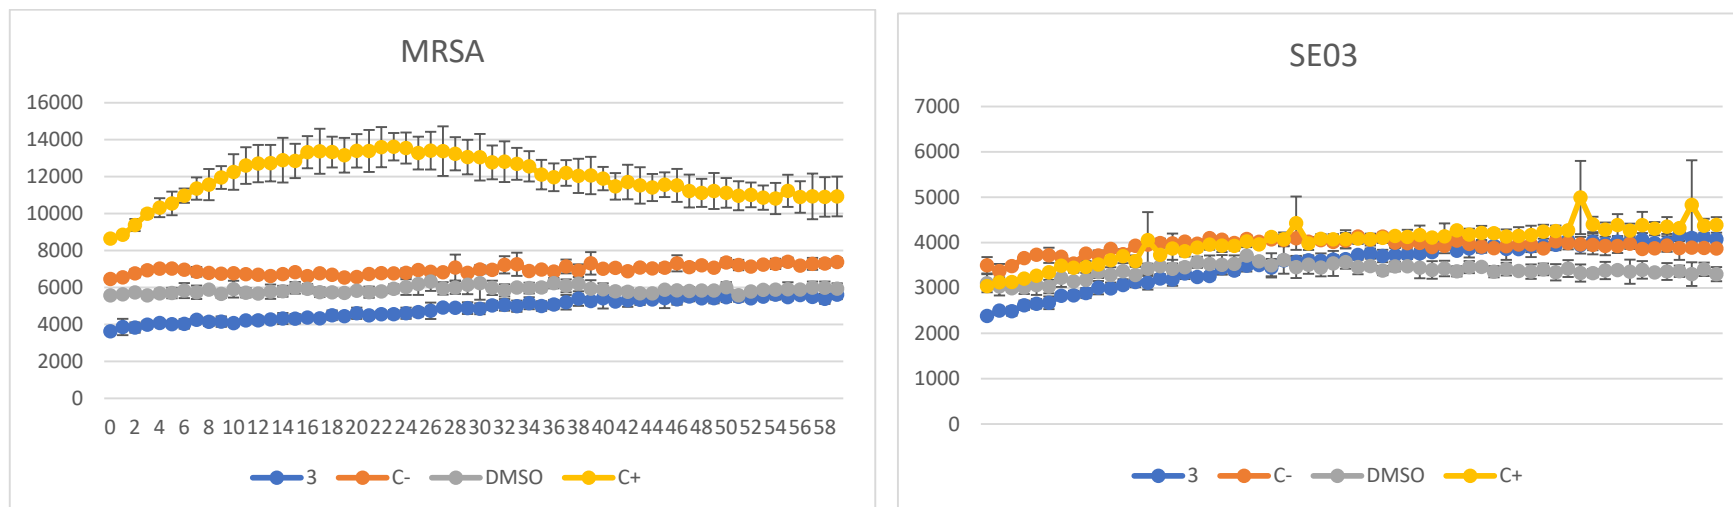

**Figure S3.** Fluorescence curves for the EB accumulation assay for compound **3**. Conditions: **3** – 50  $\mu$ M of compound **3** in a solution of EB in PBS (1  $\mu$ g/mL); **C-** – Bacteria in a solution of EB in PBS (1  $\mu$ g/mL); **C+** – 25  $\mu$ M of reserpine in a solution of EB in PBS (1  $\mu$ g/mL); **DMSO** – 1% v/v of DMSO in a solution of EB in PBS (1  $\mu$ g/mL)

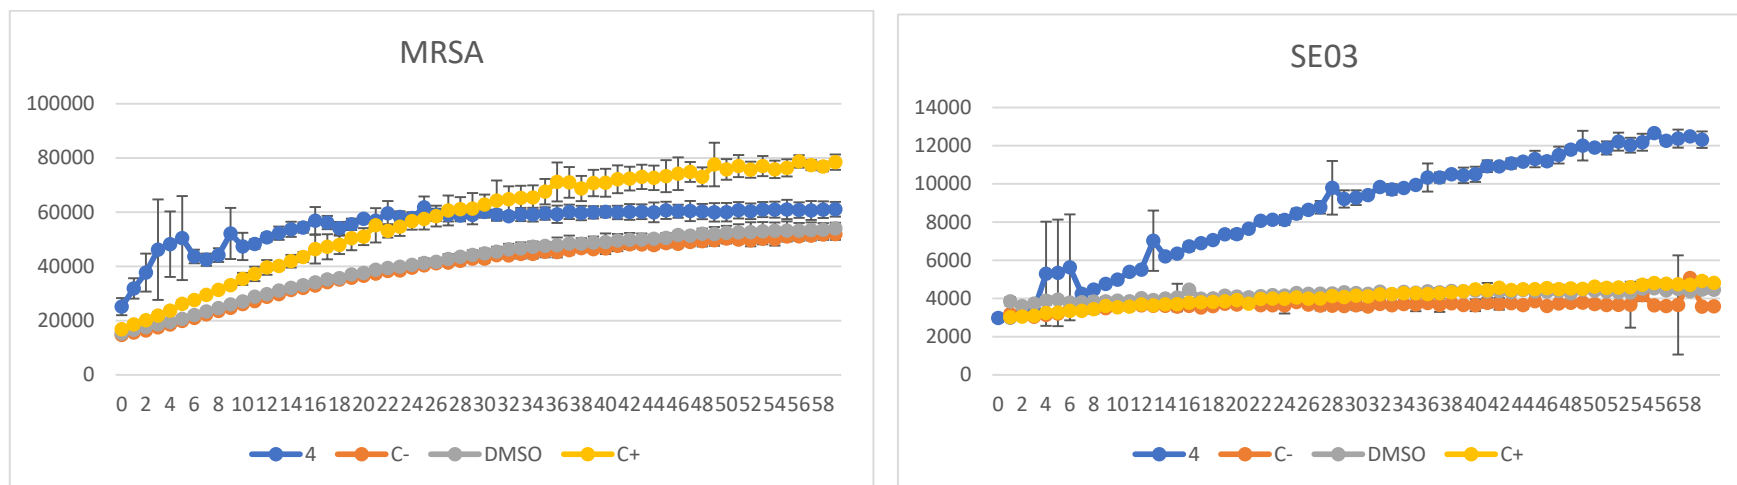

**Figure S4.** Fluorescence curves for the EB accumulation assay for compound **4**. Conditions: **4** – 50  $\mu\text{M}$  of compound **4** in a solution of EB in PBS (1  $\mu\text{g}/\text{mL}$ ); **C-** – Bacteria in a solution of EB in PBS (1  $\mu\text{g}/\text{mL}$ ); **C+** – 25  $\mu\text{M}$  of reserpine in a solution of EB in PBS (1  $\mu\text{g}/\text{mL}$ ); **DMSO** – 1% v/v of DMSO in a solution of EB in PBS (1  $\mu\text{g}/\text{mL}$ )

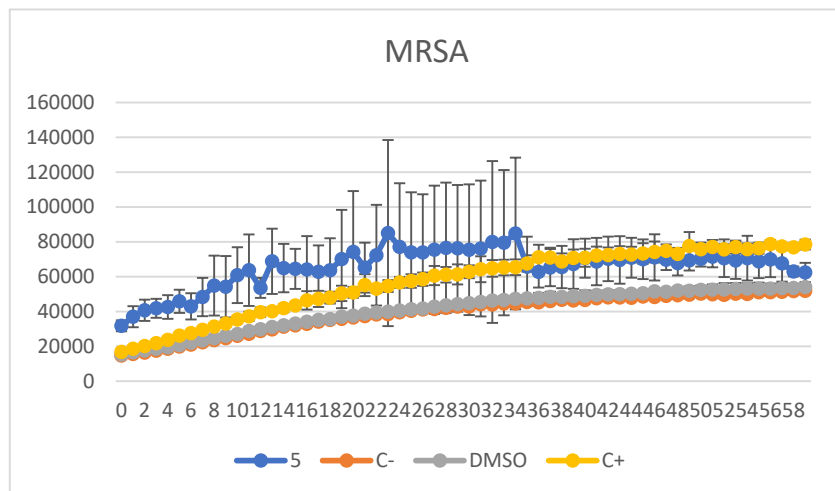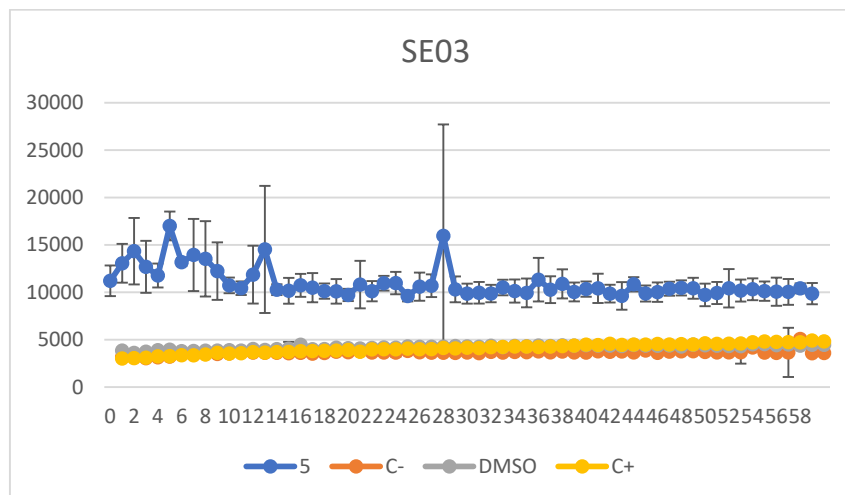

**Figure S5.** Fluorescence curves for the EB accumulation assay for compound **5**. Conditions: **5** – 50  $\mu\text{M}$  of compound **5** in a solution of EB in PBS (1  $\mu\text{g}/\text{mL}$ ); **C-** – Bacteria in a solution of EB in PBS (1  $\mu\text{g}/\text{mL}$ ); **C+** – 25  $\mu\text{M}$  of reserpine in a solution of EB in PBS (1  $\mu\text{g}/\text{mL}$ ); **DMSO** – 1% v/v of DMSO in a solution of EB in PBS (1  $\mu\text{g}/\text{mL}$ )

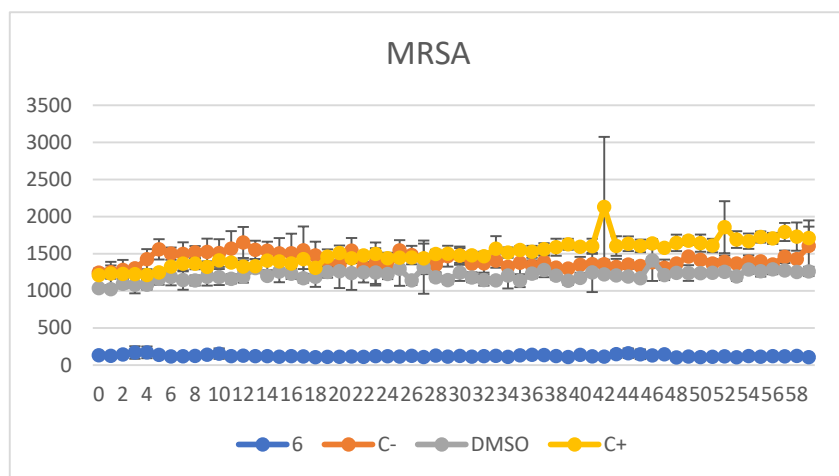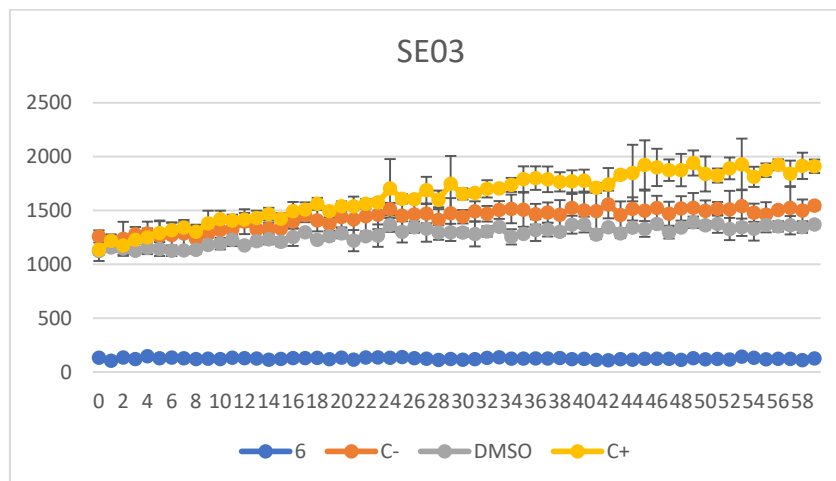

**Figure S6.** Fluorescence curves for the EB accumulation assay for compound **6**. Conditions: **6** – 50  $\mu$ M of compound **6** in a solution of EB in PBS (1  $\mu$ g/mL); **C-** – Bacteria in a solution of EB in PBS (1  $\mu$ g/mL); **C+** – 25  $\mu$ M of reserpine in a solution of EB in PBS (1  $\mu$ g/mL); **DMSO** – 1% v/v of DMSO in a solution of EB in PBS (1  $\mu$ g/mL)

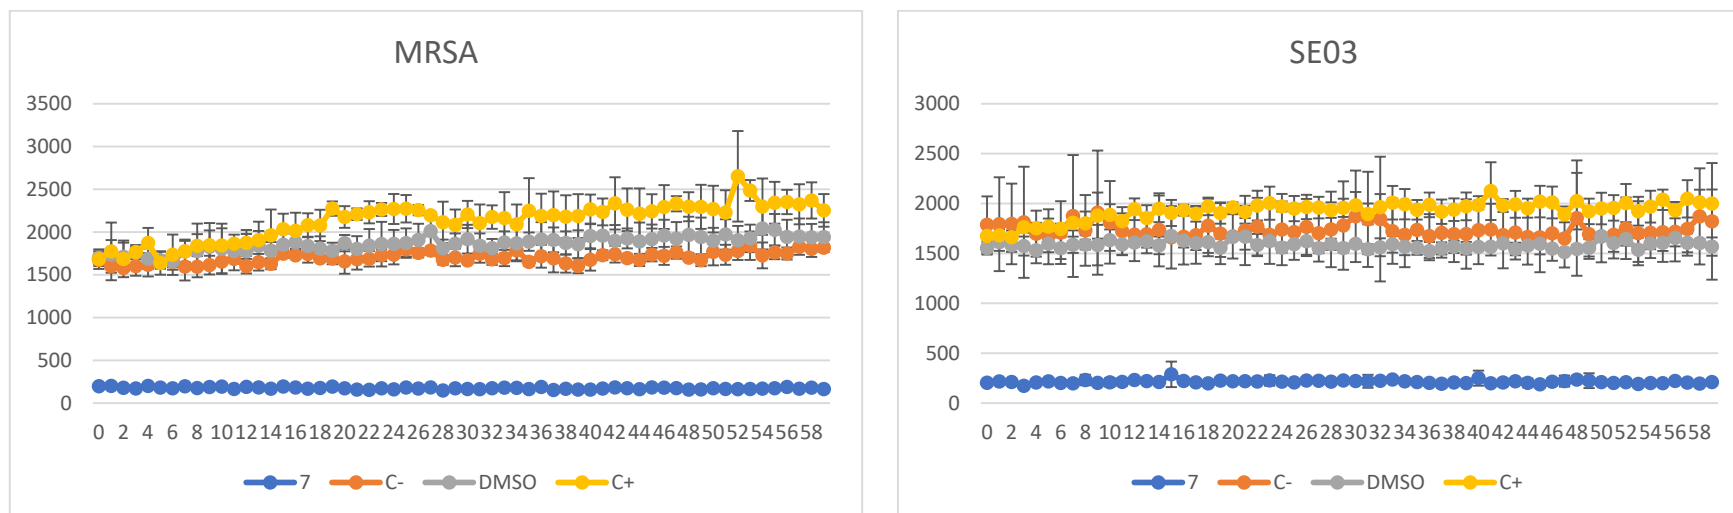

**Figure S7.** Fluorescence curves for the EB accumulation assay for compound **7**. Conditions: **7** – 50  $\mu\text{M}$  of compound **7** in a solution of EB in PBS (1  $\mu\text{g}/\text{mL}$ ); **C-** – Bacteria in a solution of EB in PBS (1  $\mu\text{g}/\text{mL}$ ); **C+** – 25  $\mu\text{M}$  of reserpine in a solution of EB in PBS (1  $\mu\text{g}/\text{mL}$ ); **DMSO** – 1% v/v of DMSO in a solution of EB in PBS (1  $\mu\text{g}/\text{mL}$ )



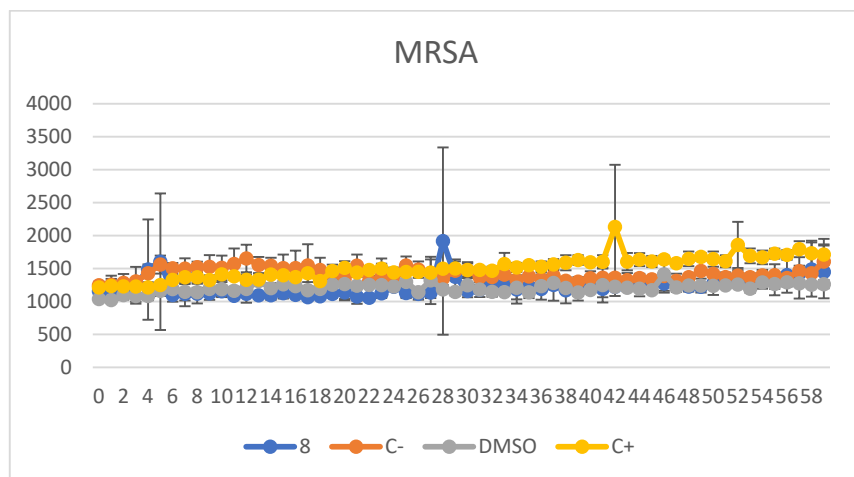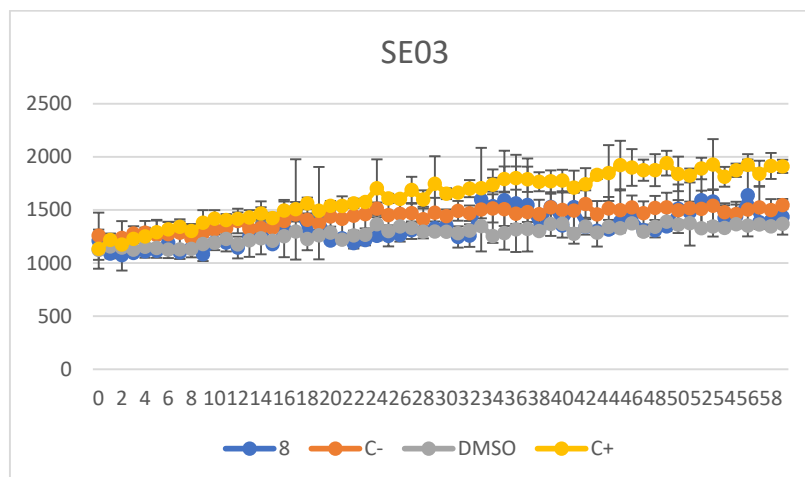

**Figure S8.** Fluorescence curves for the EB accumulation assay for compound **8**. Conditions: **8** – 50  $\mu\text{M}$  of compound **8** in a solution of EB in PBS (1  $\mu\text{g}/\text{mL}$ ); **C-** – Bacteria in a solution of EB in PBS (1  $\mu\text{g}/\text{mL}$ ); **C+** – 25  $\mu\text{M}$  of reserpine in a solution of EB in PBS (1  $\mu\text{g}/\text{mL}$ ); **DMSO** – 1% v/v of DMSO in a solution of EB in PBS (1  $\mu\text{g}/\text{mL}$ )

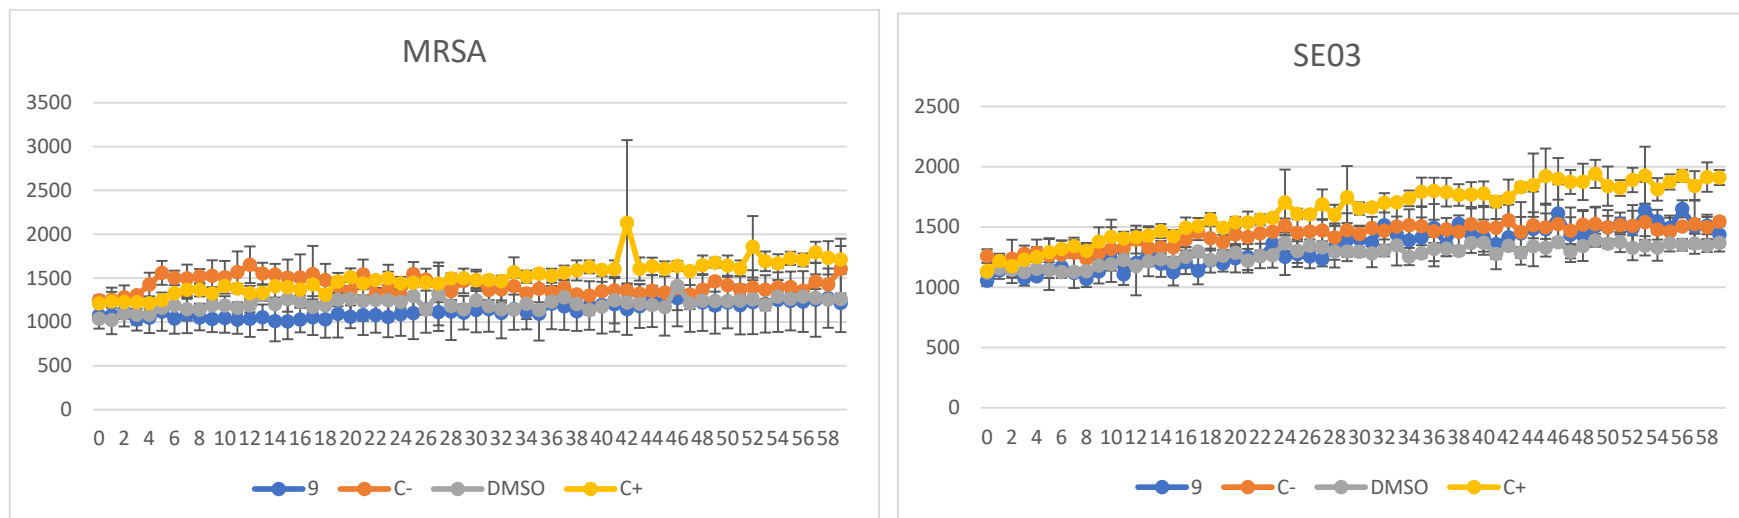

**Figure S9.** Fluorescence curves for the EB accumulation assay for compound **9**. Conditions: **9** – 50  $\mu$ M of compound **9** in a solution of EB in PBS (1  $\mu$ g/mL); **C-** – Bacteria in a solution of EB in PBS (1  $\mu$ g/mL); **C+** – 25  $\mu$ M of reserpine in a solution of EB in PBS (1  $\mu$ g/mL); **DMSO** – 1% v/v of DMSO in a solution of EB in PBS (1  $\mu$ g/mL)

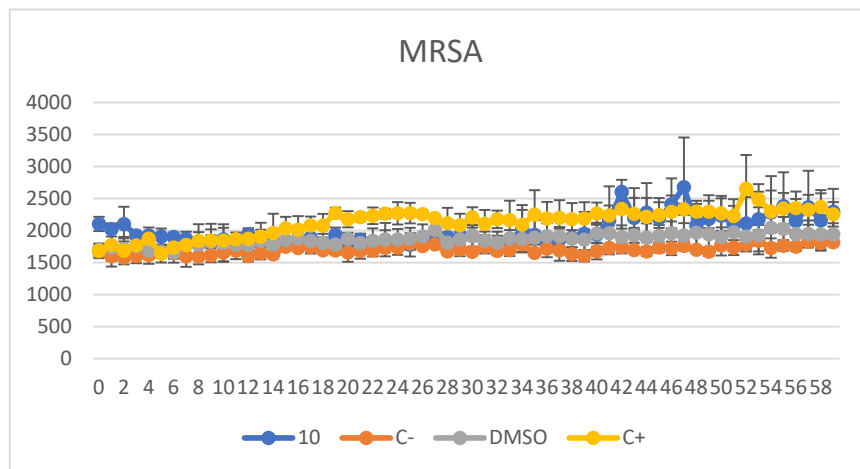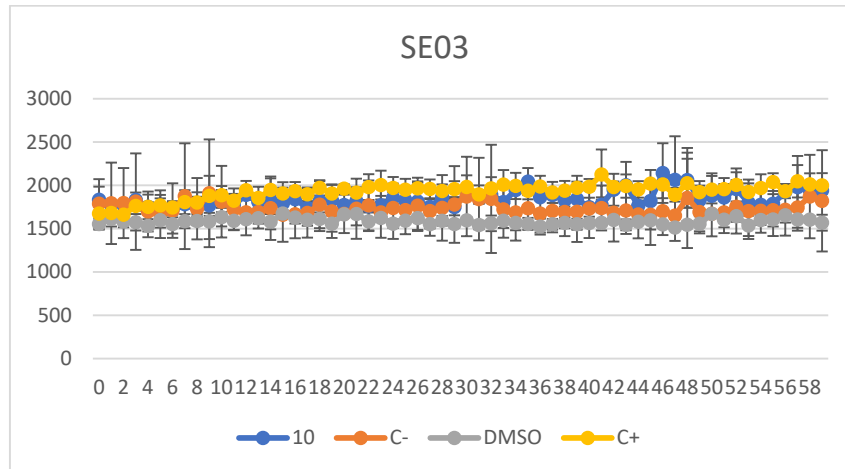

**Figure S10.** Fluorescence curves for the EB accumulation assay for compound **10**. Conditions: **10** – 50  $\mu$ M of compound **10** in a solution of EB in PBS (1  $\mu$ g/mL); **C-** – Bacteria in a solution of EB in PBS (1  $\mu$ g/mL); **C+** – 25  $\mu$ M of reserpine in a solution of EB in PBS (1  $\mu$ g/mL); **DMSO** – 1% v/v of DMSO in a solution of EB in PBS (1  $\mu$ g/mL)

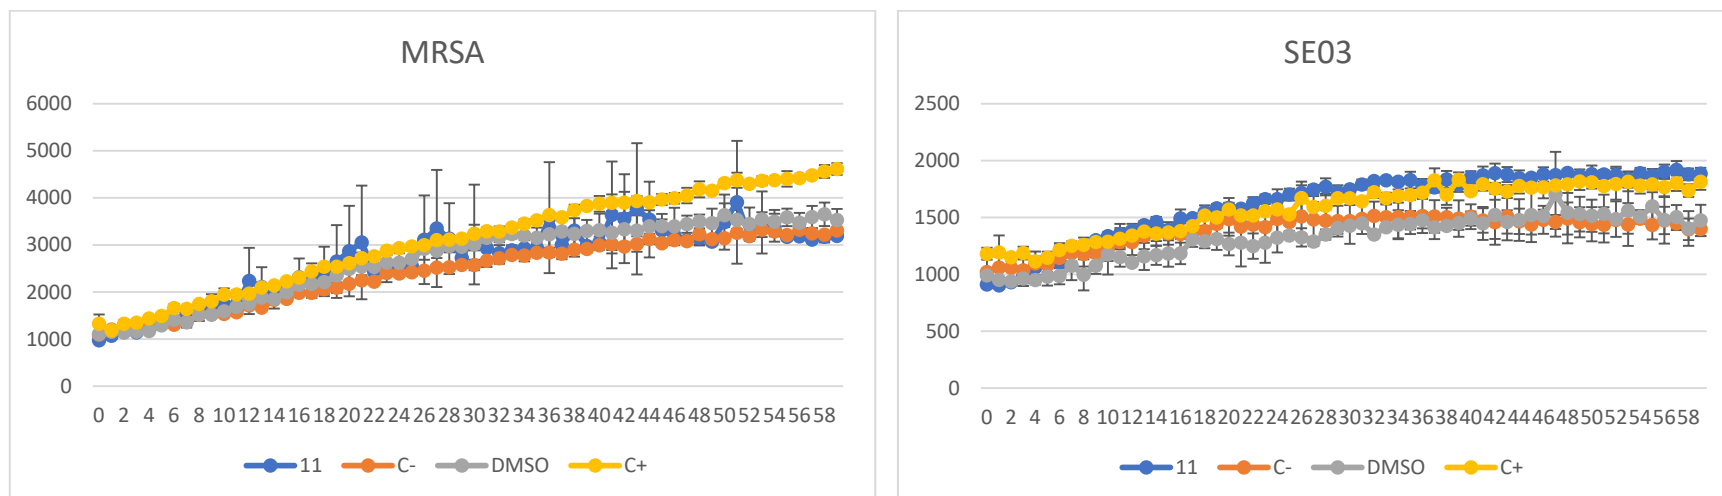

**Figure S11.** Fluorescence curves for the EB accumulation assay for compound **11**. Conditions: **11** – 50  $\mu\text{M}$  of compound **11** in a solution of EB in PBS (1  $\mu\text{g}/\text{mL}$ ); **C-** – Bacteria in a solution of EB in PBS (1  $\mu\text{g}/\text{mL}$ ); **C+** – 25  $\mu\text{M}$  of reserpine in a solution of EB in PBS (1  $\mu\text{g}/\text{mL}$ ); **DMSO** – 1% v/v of DMSO in a solution of EB in PBS (1  $\mu\text{g}/\text{mL}$ )

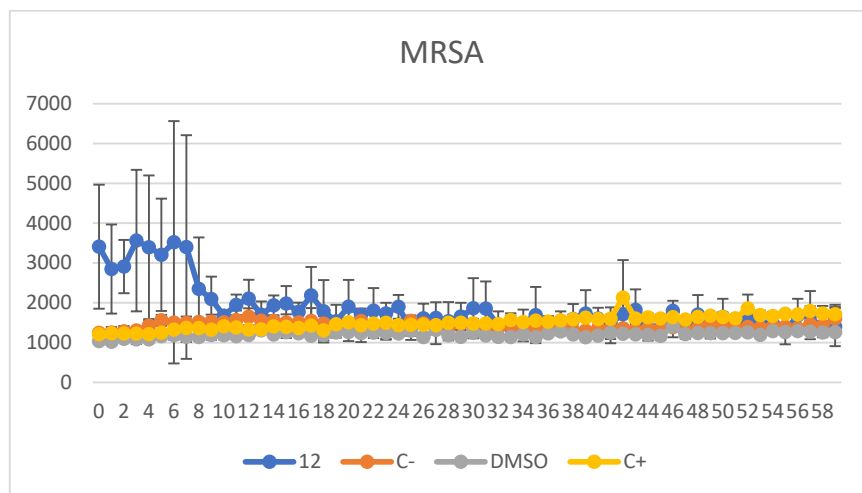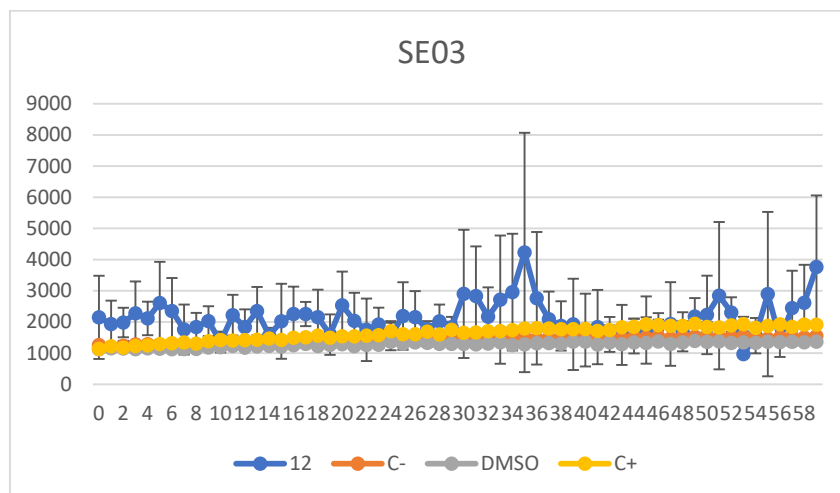

**Figure S12.** Fluorescence curves for the EB accumulation assay for compound **12**. Conditions: **12** – 50  $\mu\text{M}$  of compound **12** in a solution of EB in PBS (1  $\mu\text{g}/\text{mL}$ ); **C-** – Bacteria in a solution of EB in PBS (1  $\mu\text{g}/\text{mL}$ ); **C+** – 25  $\mu\text{M}$  of reserpine in a solution of EB in PBS (1  $\mu\text{g}/\text{mL}$ ); **DMSO** – 1% v/v of DMSO in a solution of EB in PBS (1  $\mu\text{g}/\text{mL}$ )

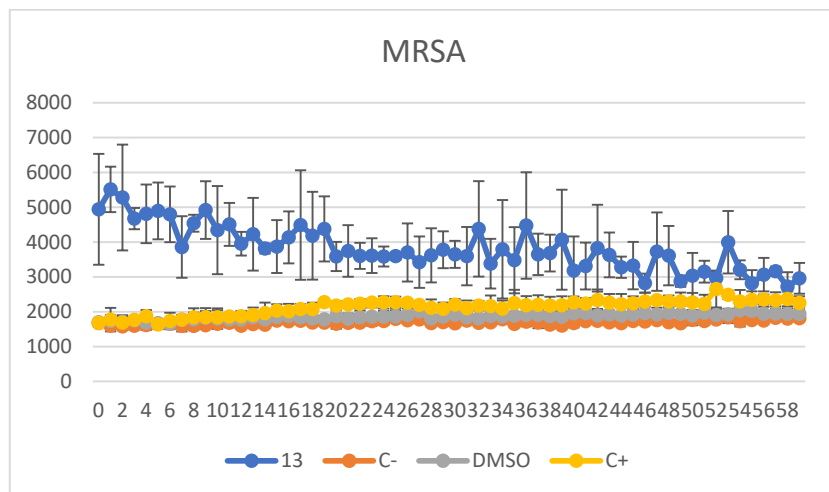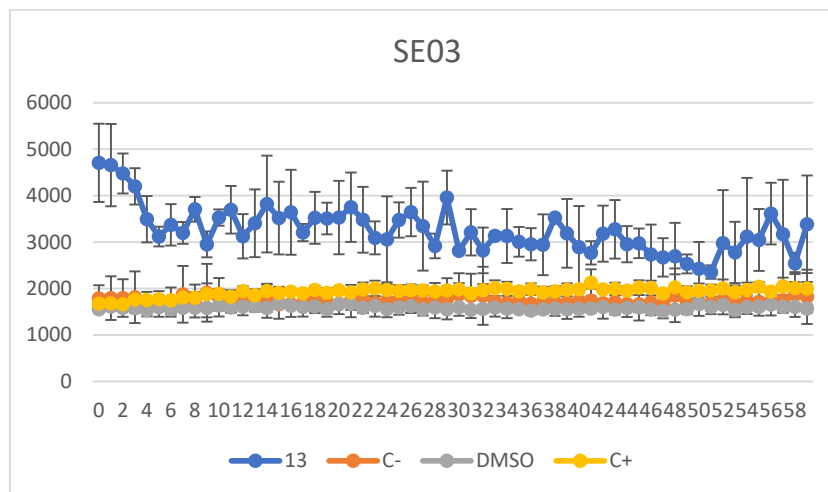

**Figure S13.** Fluorescence curves for the EB accumulation assay for compound **13**. Conditions: **13** – 50  $\mu\text{M}$  of compound **13** in a solution of EB in PBS (1  $\mu\text{g}/\text{mL}$ ); **C-** – Bacteria in a solution of EB in PBS (1  $\mu\text{g}/\text{mL}$ ); **C+** – 25  $\mu\text{M}$  of reserpine in a solution of EB in PBS (1  $\mu\text{g}/\text{mL}$ ); **DMSO** – 1% v/v of DMSO in a solution of EB in PBS (1  $\mu\text{g}/\text{mL}$ )

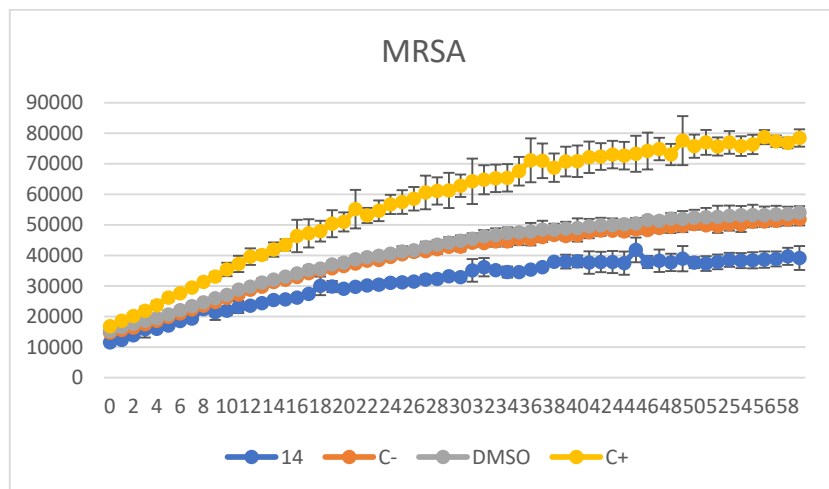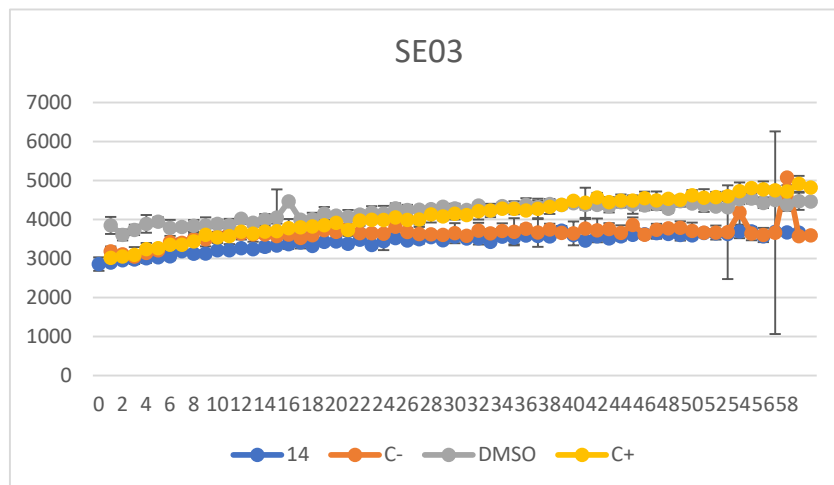

**Figure S14.** Fluorescence curves for the EB accumulation assay for compound **14**. Conditions: **14** – 50  $\mu$ M of compound **14** in a solution of EB in PBS (1  $\mu$ g/mL); **C-** – Bacteria in a solution of EB in PBS (1  $\mu$ g/mL); **C+** – 25  $\mu$ M of reserpine in a solution of EB in PBS (1  $\mu$ g/mL); **DMSO** – 1% v/v of DMSO in a solution of EB in PBS (1  $\mu$ g/mL)

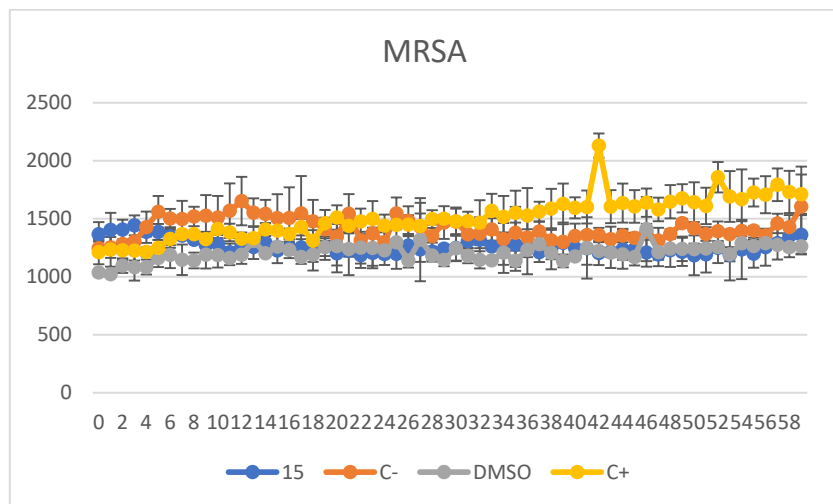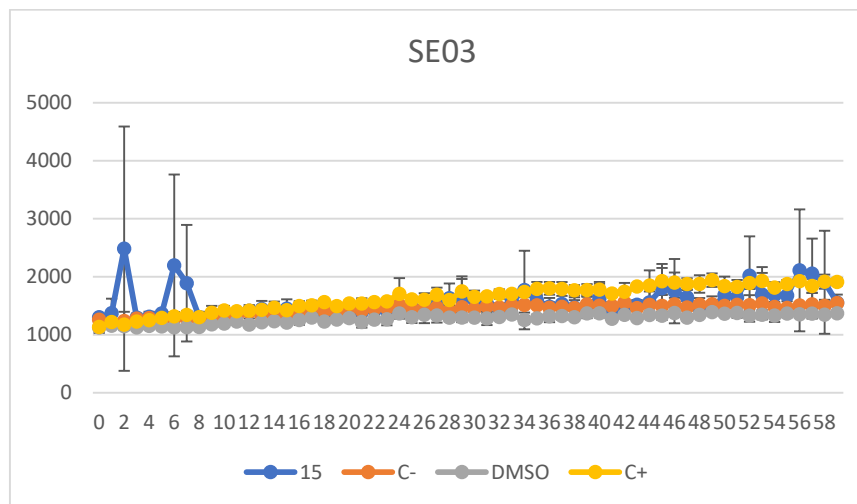

**Figure S15.** Fluorescence curves for the EB accumulation assay for compound **15**. Conditions: **15** – 50  $\mu$ M of compound **15** in a solution of EB in PBS (1  $\mu$ g/mL); **C-** – Bacteria in a solution of EB in PBS (1  $\mu$ g/mL); **C+** – 25  $\mu$ M of reserpine in a solution of EB in PBS (1  $\mu$ g/mL); **DMSO** – 1% v/v of DMSO in a solution of EB in PBS (1  $\mu$ g/mL)



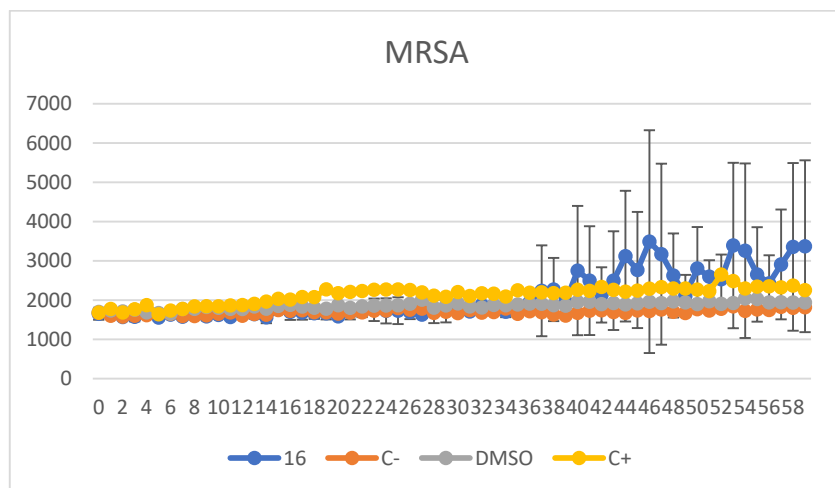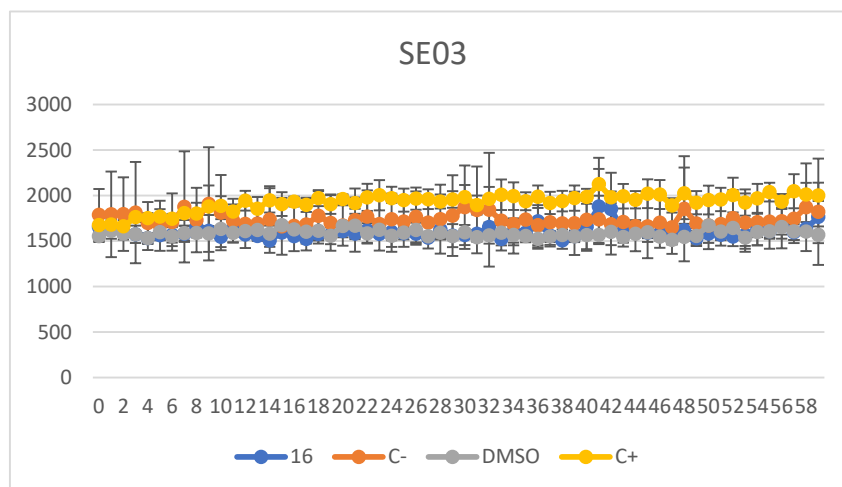

**Figure S16.** Fluorescence curves for the EB accumulation assay for compound **16**. Conditions: **16** – 50  $\mu$ M of compound **16** in a solution of EB in PBS (1  $\mu$ g/mL); **C-** – Bacteria in a solution of EB in PBS (1  $\mu$ g/mL); **C+** – 25  $\mu$ M of reserpine in a solution of EB in PBS (1  $\mu$ g/mL); **DMSO** – 1% v/v of DMSO in a solution of EB in PBS (1  $\mu$ g/mL)

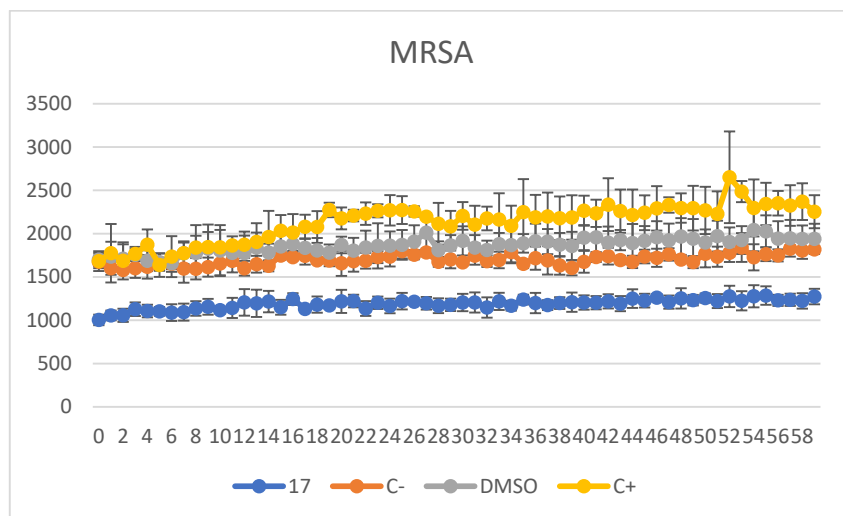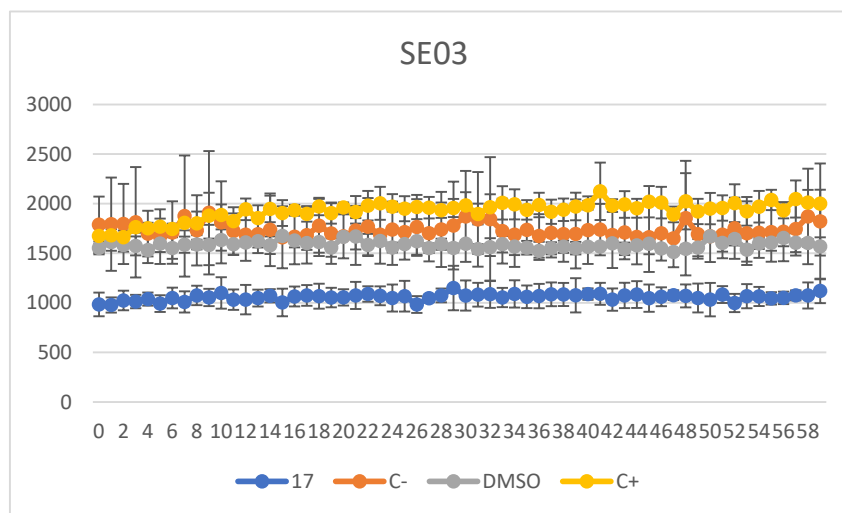

**Figure S17.** Fluorescence curves for the EB accumulation assay for compound **17**. Conditions: **17** – 50  $\mu$ M of compound **17** in a solution of EB in PBS (1  $\mu$ g/mL); **C-** – Bacteria in a solution of EB in PBS (1  $\mu$ g/mL); **C+** – 25  $\mu$ M of reserpine in a solution of EB in PBS (1  $\mu$ g/mL); **DMSO** – 1% v/v of DMSO in a solution of EB in PBS (1  $\mu$ g/mL)

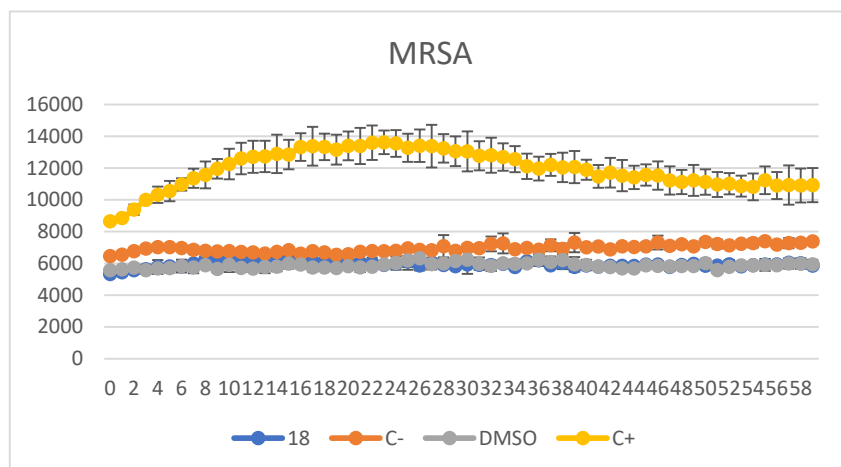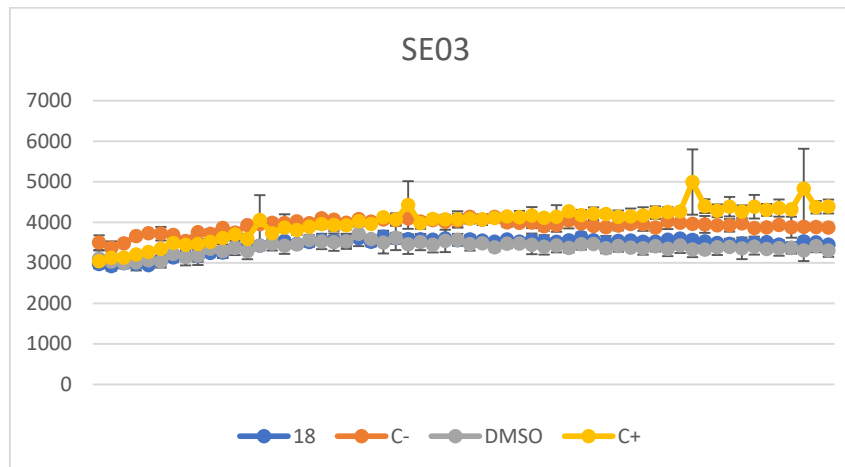

**Figure S18.** Fluorescence curves for the EB accumulation assay for compound **18**. Conditions: **18** – 50  $\mu\text{M}$  of compound **18** in a solution of EB in PBS (1  $\mu\text{g}/\text{mL}$ ); **C-** – Bacteria in a solution of EB in PBS (1  $\mu\text{g}/\text{mL}$ ); **C+** – 25  $\mu\text{M}$  of reserpine in a solution of EB in PBS (1  $\mu\text{g}/\text{mL}$ ); **DMSO** – 1% v/v of DMSO in a solution of EB in PBS (1  $\mu\text{g}/\text{mL}$ )

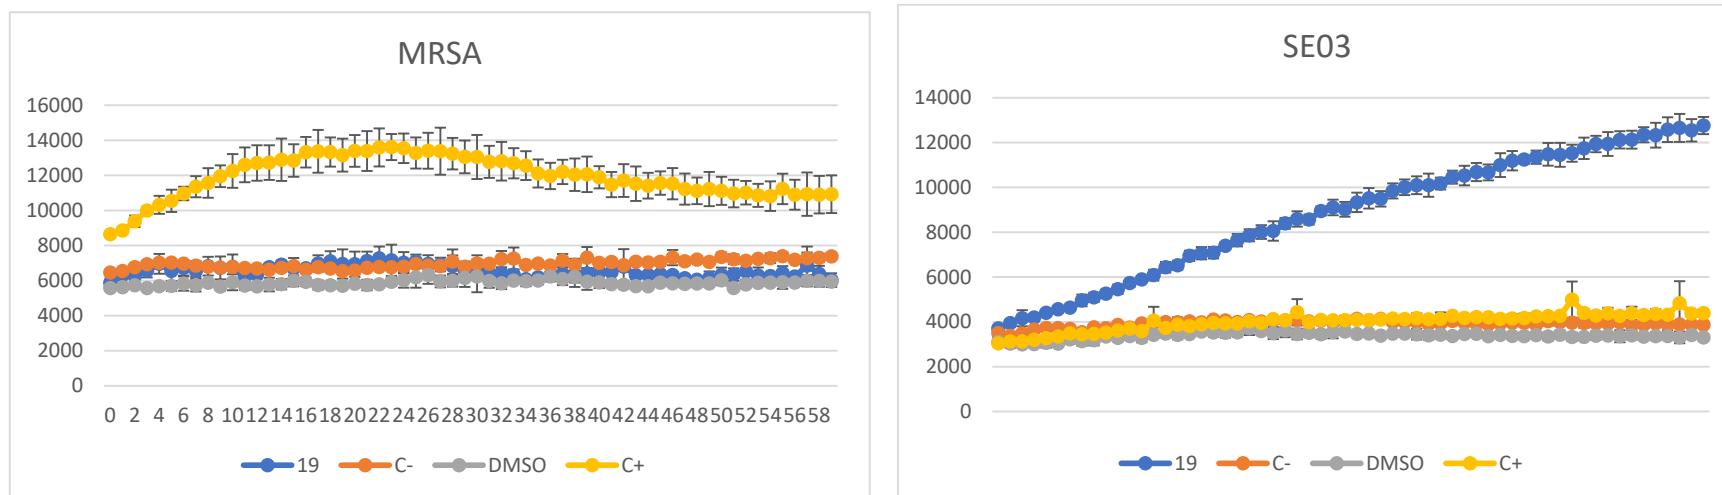

**Figure S19.** Fluorescence curves for the EB accumulation assay for compound **19**. Conditions: **19** – 50  $\mu$ M of compound **19** in a solution of EB in PBS (1  $\mu$ g/mL); **C-** – Bacteria in a solution of EB in PBS (1  $\mu$ g/mL); **C+** – 25  $\mu$ M of reserpine in a solution of EB in PBS (1  $\mu$ g/mL); **DMSO** – 1% v/v of DMSO in a solution of EB in PBS (1  $\mu$ g/mL)

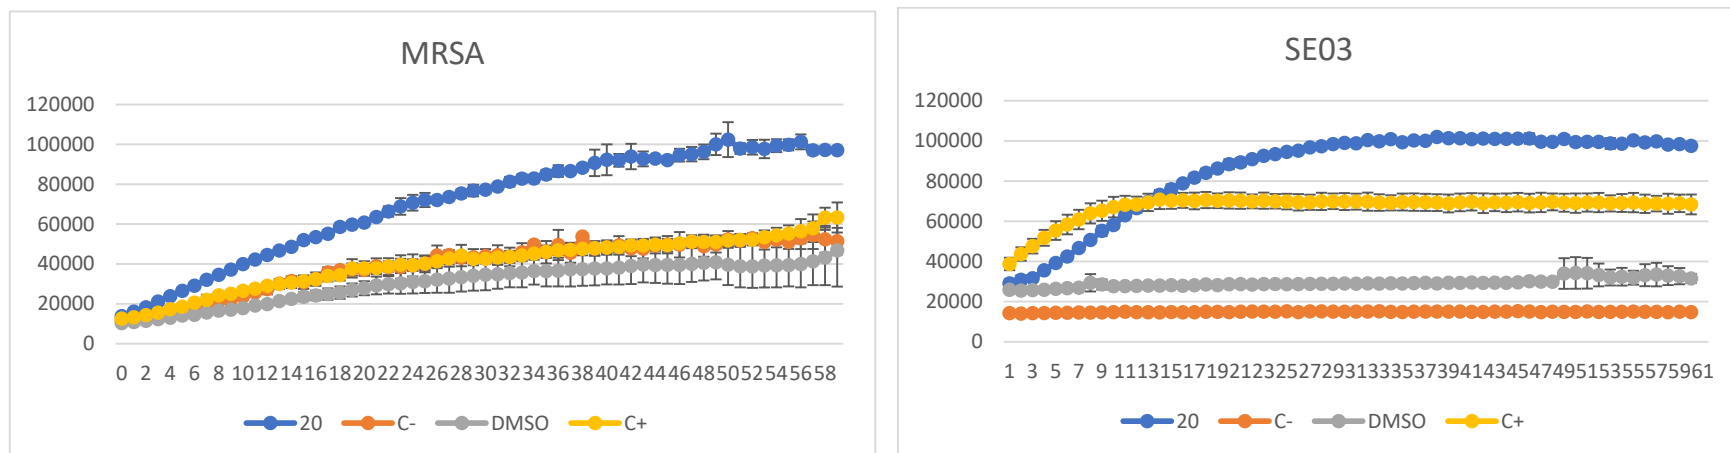

**Figure S20.** Fluorescence curves for the EB accumulation assay for compound **20**. Conditions: **20** – 50  $\mu$ M of compound **20** in a solution of EB in PBS (1  $\mu$ g/mL); **C-** – Bacteria in a solution of EB in PBS (1  $\mu$ g/mL); **C+** – 25  $\mu$ M of reserpine in a solution of EB in PBS (1  $\mu$ g/mL); **DMSO** – 1% v/v of DMSO in a solution of EB in PBS (1  $\mu$ g/mL)

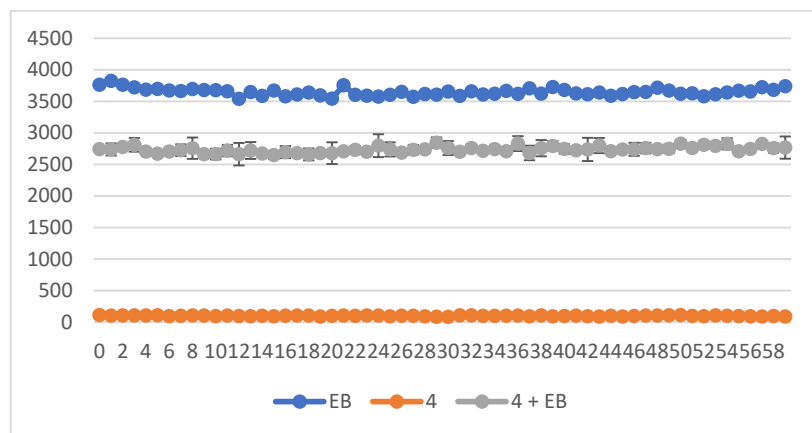

**Figure S21.** Fluorescence curves for compound **4**. Conditions: **4 + EB**– 50  $\mu$ M of compound **4** in a solution of EB in PBS (1  $\mu$ g/mL); **4** – 50  $\mu$ M of compound **4** in PBS; **EB** – Solution of EB in PBS (1  $\mu$ g/mL)

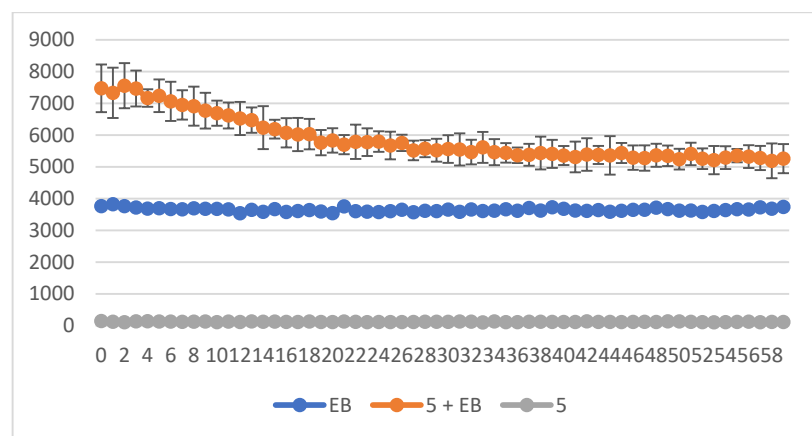

**Figure S22.** Fluorescence curves for compound **5**. Conditions: **5 + EB**– 50  $\mu$ M of compound **5** in a solution of EB in PBS (1  $\mu$ g/mL); **5** – 50  $\mu$ M of compound **5** in PBS; **EB** – Solution of EB in PBS (1  $\mu$ g/mL)

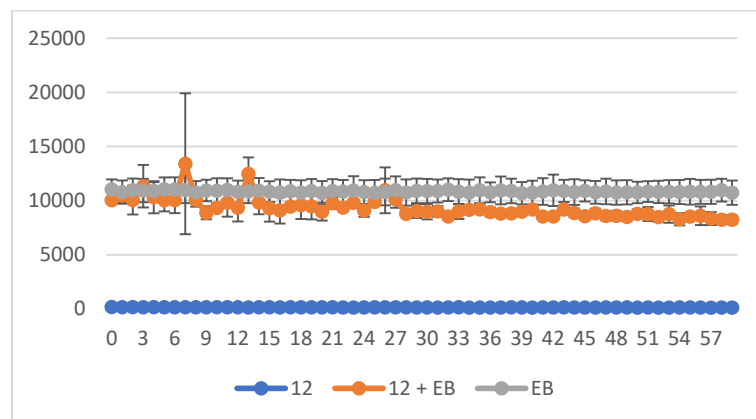

**Figure S23.** Fluorescence curves for compound **12**. Conditions: **12 + EB**– 50  $\mu$ M of compound **12** in a solution of EB in PBS (1  $\mu$ g/mL); **12** – 50  $\mu$ M of compound **12** in PBS; **EB** – Solution of EB in PBS (1  $\mu$ g/mL).

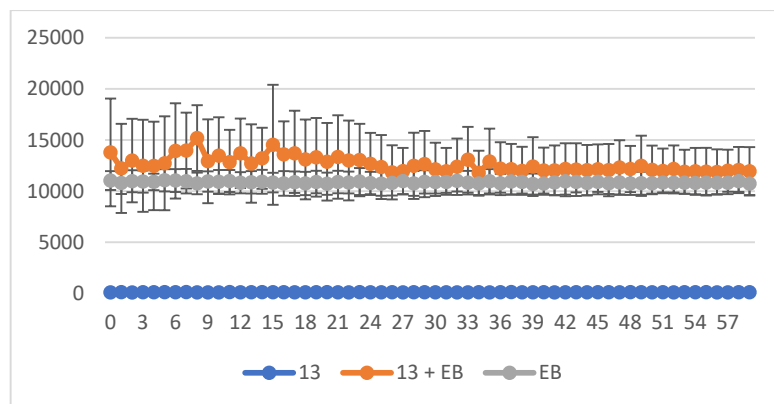

**Figure S24.** Fluorescence curves for compound **13**. Conditions: **13 + EB**– 50  $\mu$ M of compound **13** in a solution of EB in PBS (1  $\mu$ g/mL); **13** – 50  $\mu$ M of compound **13** in PBS; **EB** – Solution of EB in PBS (1  $\mu$ g/mL).

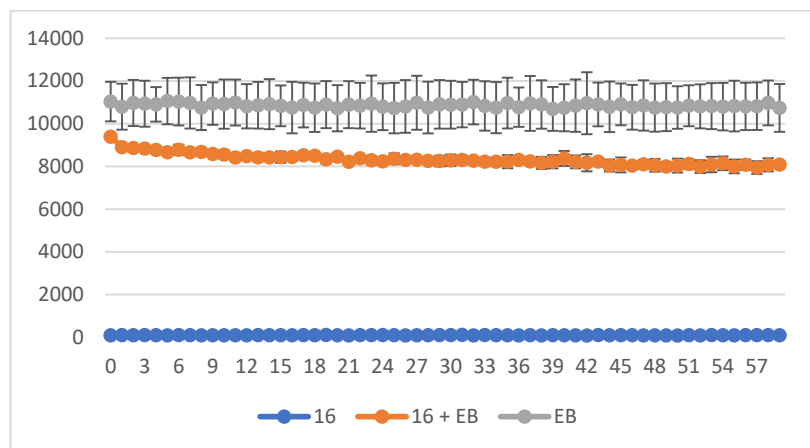

**Figure S25.** Fluorescence curves for compound **16**. Conditions: **16 + EB**– 50  $\mu$ M of compound **16** in a solution of EB in PBS (1  $\mu$ g/mL); **16** – 50  $\mu$ M of compound **16** in PBS; **EB** – Solution of EB in PBS (1  $\mu$ g/mL).
